# Supplementary material for: Survival-Associated Metabolic Genes in Human Papillomavirus-Positive Head and Neck Cancers
Source: MDPI journal article supplement (doi:10.3390/cancers12010253), 2020-01-20
Supplement: s1 [file s1]

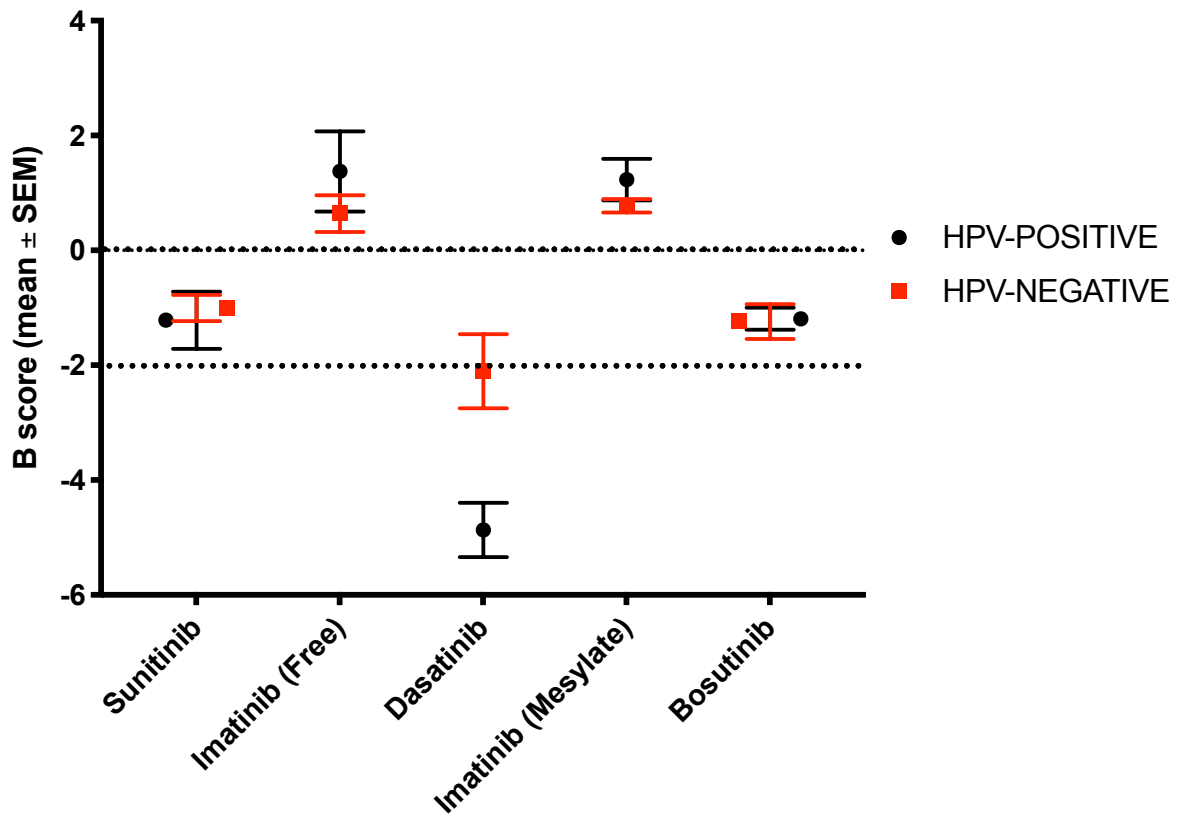

**Supplementary Figure 1.** Tyrosine kinase inhibitor activity in 27 HNSCC cell lines based on HPV status. B-scores  $\pm$  SEM were calculated for HPV+ and HPV- HNSCC cell lines from a high throughput drug screen. Active drugs exhibit a B-score below -2. Red line = HPV-, Black line = HPV+.
