# Supplementary material for: Survival-Associated Metabolic Genes in Human Papillomavirus-Positive Head and Neck Cancers
Source: MDPI journal article supplement (doi:10.3390/cancers12010253), 2020-01-20
Supplement: s1 [file s1]

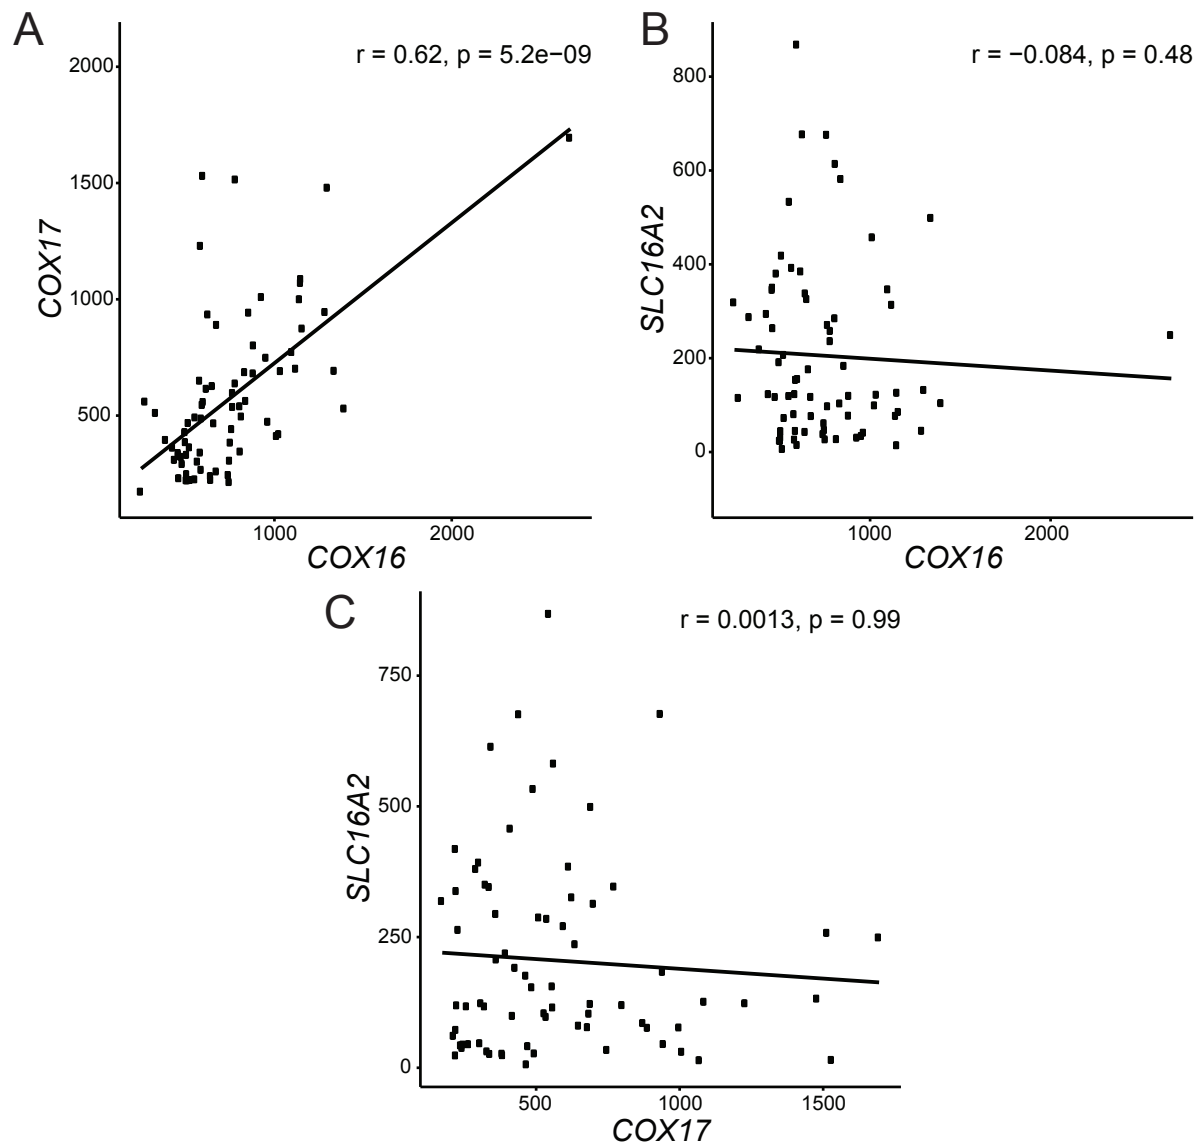

**Supplementary Figure 2.** Correlation plots of independently significant genes identified by multivariate analysis. (A) Expression *COX16* and *COX17* were significantly correlated ( $r=0.62$ ,  $p=5.2 \times 10^{-9}$ ) in HPV+ HNSCCs. (B) Expression *SLC16A2* and *COX16* were not correlated ( $r=-0.084$ ,  $p=0.48$ ). (C) Expression of *SLC16A2* and *COX17* were not correlated ( $r=0.0013$ ,  $p=0.99$ ).
